# Supplementary material for: Low-Level Tolerance to Antibiotic Trimethoprim in QAC-Adapted Subpopulations of Listeria monocytogenes
Source: MDPI journal article supplement (doi:10.3390/foods10081800), 2021-08-04
Supplement: s1 [file s1]

Supplementary Material

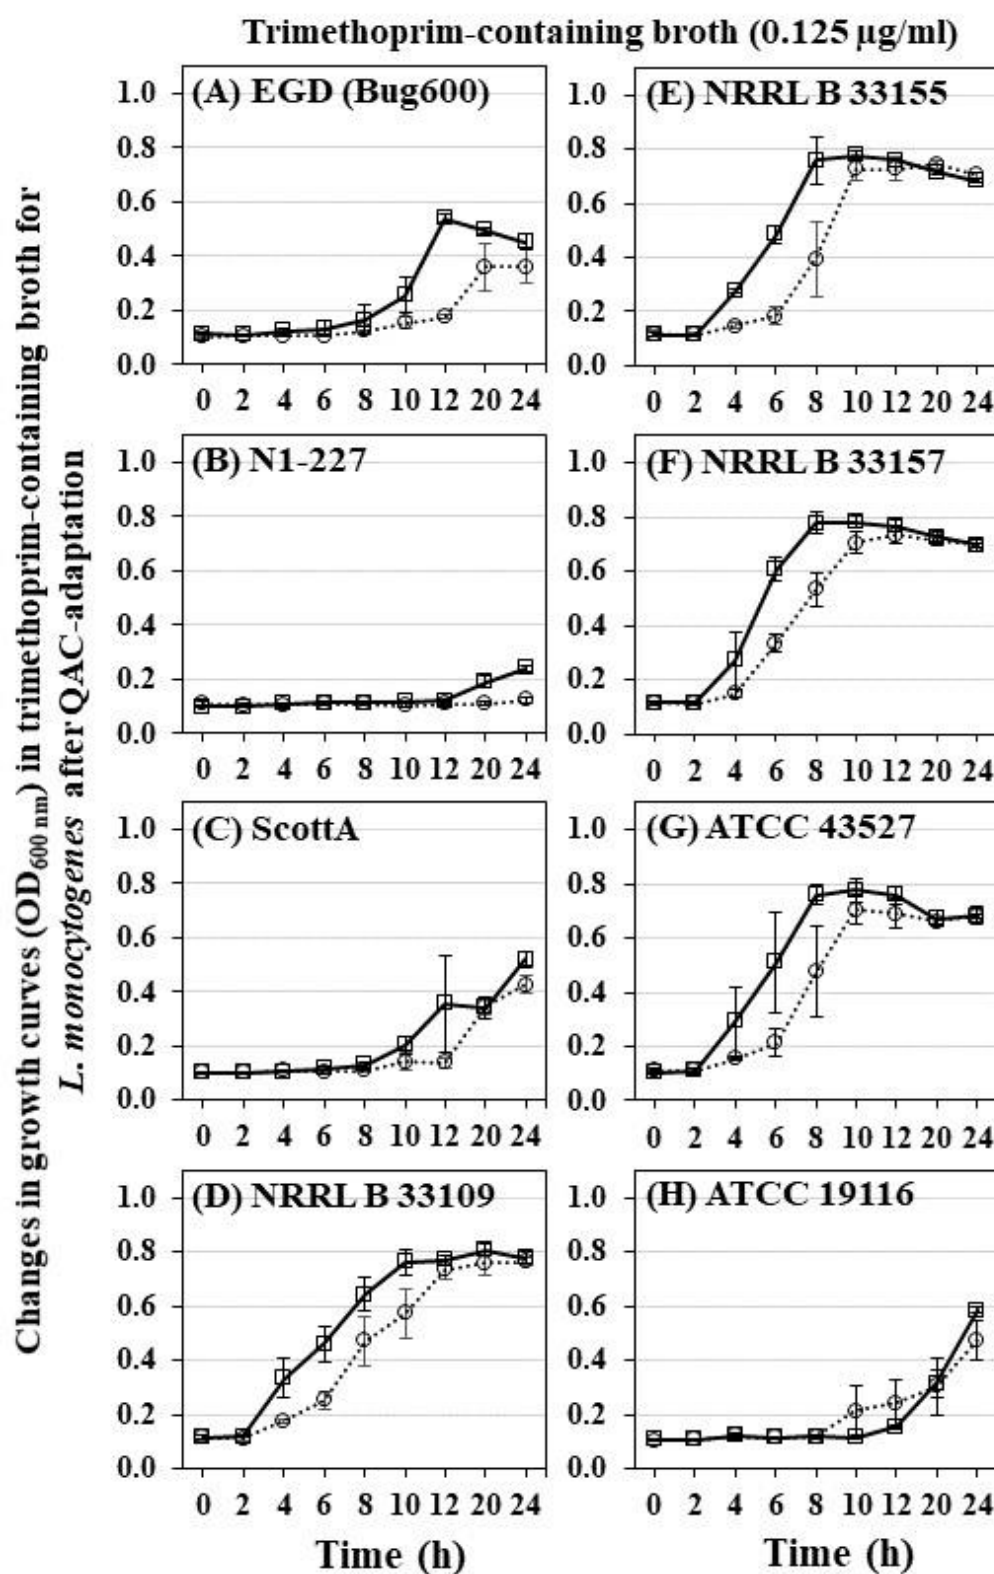

**Figure S1.** Changes in growth rate ( $\text{OD}_{600}$ ) in trimethoprim (at 0.125  $\mu\text{g/ml}$  in TSBYE) of QAC-adapted subpopulation 1 (open squares) compared to non-adapted control (open circles) cells of eight *L. monocytogenes* strains at 37°C: (A) EGD (Bug600), (B) N1-227, (C) ScottA, (D) NRRL B 33109, (E) NRRL B 33155, (F) NRRL B 33157, (G) ATCC 43527, (H) ATCC 19116. Error bars indicate standard error of means.

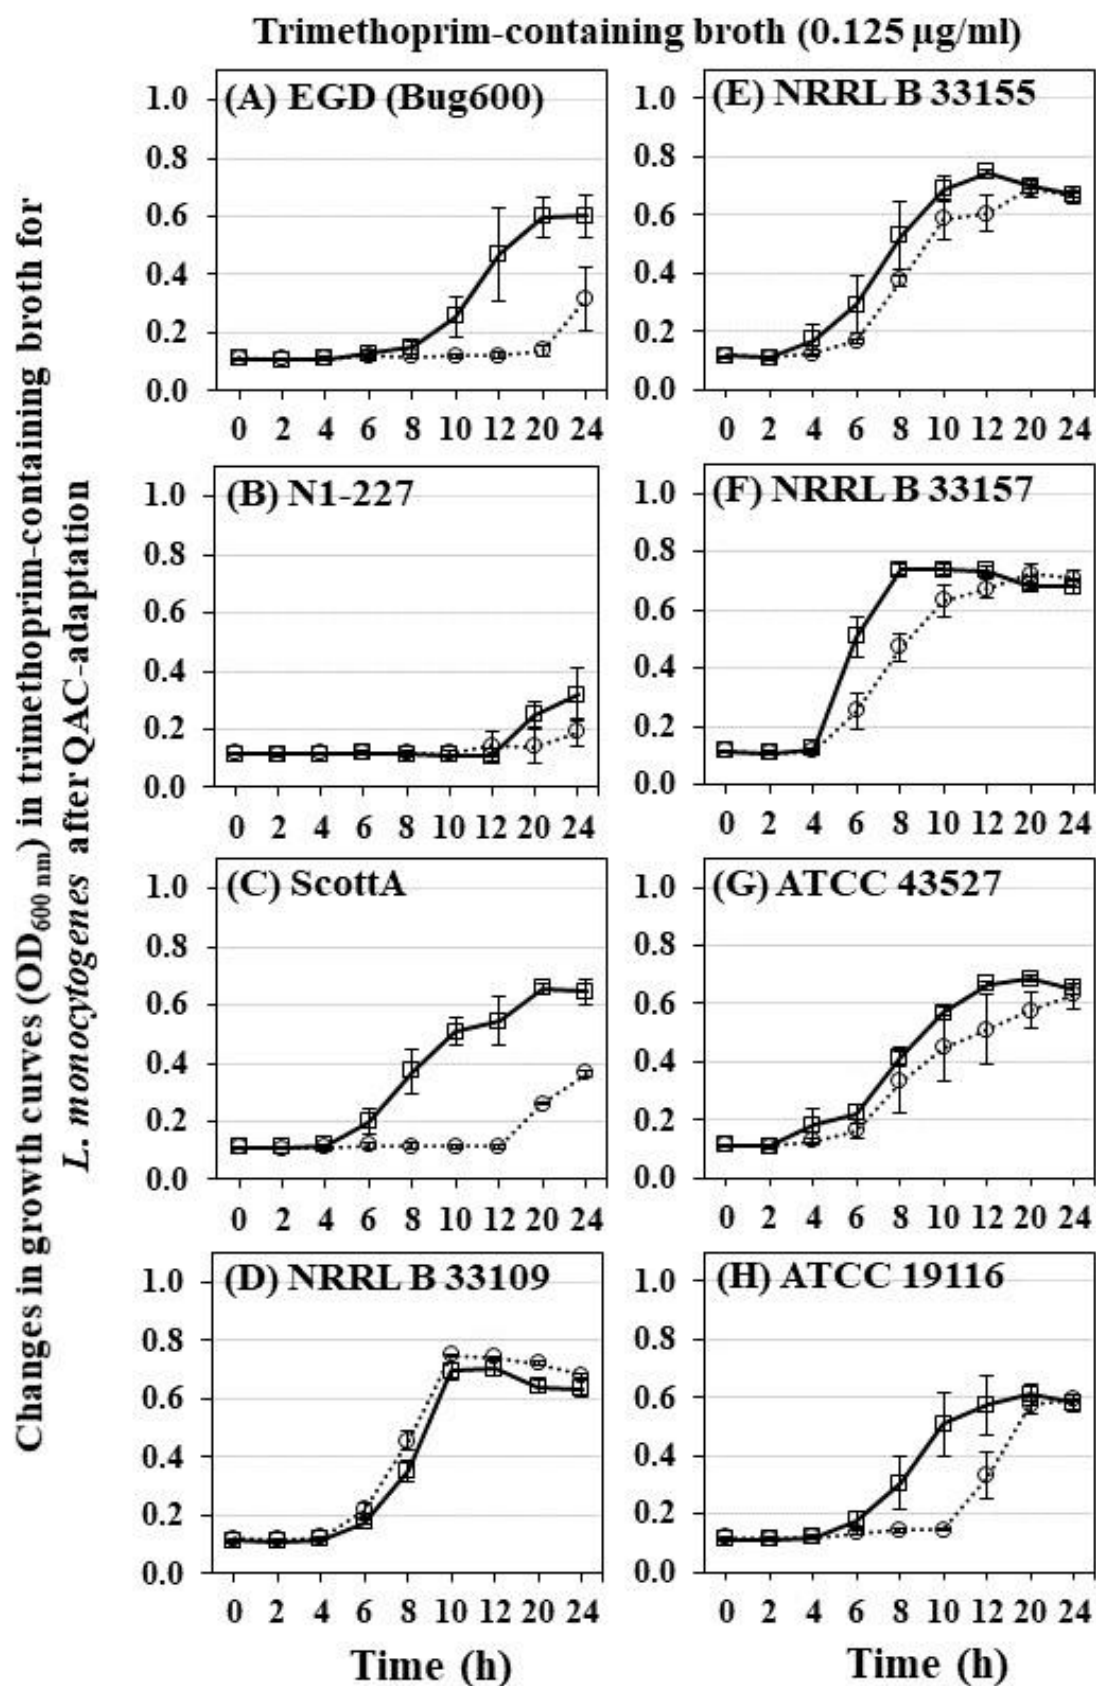

**Figure S2.** Changes in growth rate ( $\text{OD}_{600}$ ) in trimethoprim (at 0.125  $\mu\text{g/ml}$  in TSBYE) of QAC-adapted subpopulation 2 (open squares) compared to non-adapted control (open circles) cells of eight *L. monocytogenes* strains at 37°C: (A) EGD (Bug600), (B) N1-227, (C) ScottA, (D) NRRL B 33109, (E) NRRL B 33155, (F) NRRL B 33157, (G) ATCC 43527, (H) ATCC 19116. Error bars indicate standard error of means.

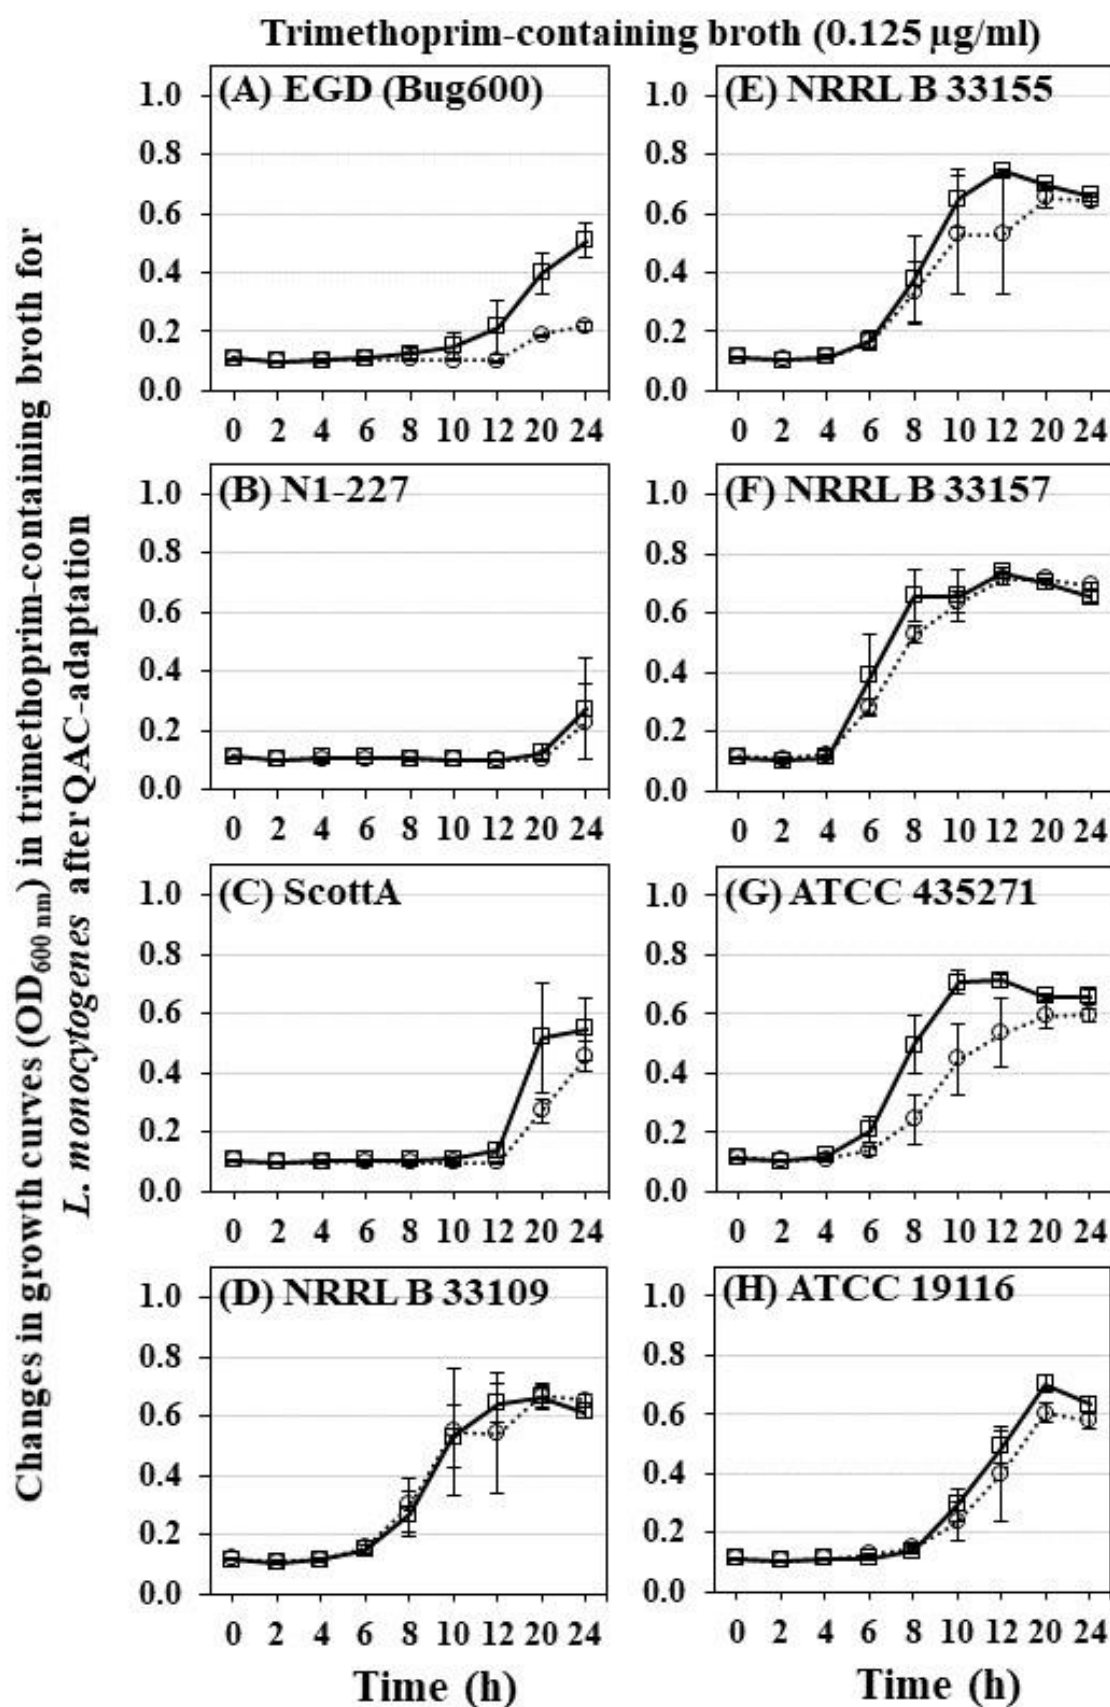

**Figure S3.** Changes in growth rate ( $\text{OD}_{600}$ ) in trimethoprim (at 0.125  $\mu\text{g/ml}$  in TSBYE) of QAC-adapted subpopulation 3 (open squares) compared to non-adapted control (open circles) cells of eight *L. monocytogenes* strains at 37°C: (A) EGD (Bug600), (B) N1-227, (C) ScottA, (D) NRRL B 33109, (E) NRRL B 33155, (F) NRRL B 33157, (G) ATCC 43527, (H) ATCC 19116. Error bars indicate standard error of means.
